# Supplementary material
Source: PubMed Central journal article supplement (PMC7412734)
Supplement: NIHMS1609022-supplement-2.pdf [file NIHMS1609022-supplement-2.pdf]

## SUPPLEMENTAL MATERIAL

- Supplemental Table 1: ICD-9-CM diagnosis codes used to identify long-term ICD complications  
Adapted from Ranasinghe et al., Ann Intern Med. 2016: 165:20-29.
- Supplemental Table 2: Claims codes used for defining ICD reoperations for reasons other than complications  
Adapted from Ranasinghe et al., Ann Intern Med. 2016: 165:20-29.
- Supplemental Table 3: Additional Baseline Characteristics by Physician Specialties

Supplemental Table 1

| Complication                                                     |                    |                      |                         | Codes Used to Identify                                                                                              |
|------------------------------------------------------------------|--------------------|----------------------|-------------------------|---------------------------------------------------------------------------------------------------------------------|
|                                                                  | Primary Diagnosis* | Secondary Diagnosis* | ICD-9-CM Diagnosis Code | Code Description                                                                                                    |
| <b>Mechanical complication</b>                                   | X                  |                      | 996.04                  | Mechanical complication of automatic implantable cardiac defibrillator                                              |
|                                                                  | X                  |                      | 996.01                  | Mechanical complication due to cardiac pacemaker (electrode)                                                        |
|                                                                  | X                  |                      | 996.09                  | Other mechanical complication of cardiac device, implant, and graft                                                 |
|                                                                  | X                  |                      | 996.00                  | Mechanical complication of unspecified cardiac device, implant, and                                                 |
|                                                                  | X                  |                      | 996.0x                  | Mechanical complication of cardiac device implant and graft                                                         |
|                                                                  | X                  |                      | 996.72                  | Other complications due to other cardiac device, implant, and graft                                                 |
| <b>Infection</b>                                                 |                    |                      |                         |                                                                                                                     |
| Device specific                                                  | X                  | X                    | 996.61                  | Infection and inflammatory reaction due to cardiac device, implant, and graft                                       |
| Systemic infection                                               | X                  | X                    | 038.xx                  | Septicemia                                                                                                          |
|                                                                  | X                  | X                    | 785.52                  | Septic shock                                                                                                        |
|                                                                  | X                  | X                    | 790.7                   | Bacteremia                                                                                                          |
| Endocarditis                                                     | X                  | X                    | 421.0                   | Acute and subacute bacterial endocarditis                                                                           |
|                                                                  | X                  | X                    | 421.9                   | Acute endocarditis, unspecified                                                                                     |
|                                                                  | X                  | X                    | 424.9                   | Endocarditis, valve unspecified                                                                                     |
| Other infection                                                  | X                  |                      | 998.5                   | Postoperative infection not elsewhere classified                                                                    |
|                                                                  | X                  |                      | 998.51                  | Infected postoperative seroma                                                                                       |
|                                                                  | X                  |                      | 998.59                  | Other postoperative infection                                                                                       |
|                                                                  | X                  |                      | 999.3x                  | Other infection due to medical care not elsewhere classified                                                        |
|                                                                  | X                  |                      | 682.2                   | Cellulitis of the trunk                                                                                             |
| <b>Pneumothorax</b>                                              | X                  |                      | 512.1                   | Iatrogenic pneumothorax                                                                                             |
| <b>Pleural effusion</b>                                          | X                  |                      | 511.9                   | Unspecified pleural effusion                                                                                        |
| <b>Pericardial effusion</b>                                      | X                  |                      | 423.0                   | Hemopericardium                                                                                                     |
|                                                                  | X                  |                      | 423.3                   | Cardiac tamponade                                                                                                   |
|                                                                  | X                  |                      | 423.9                   | Unspecified disease of pericardium (note no specific code for pericardial effusion, this is what is typically used) |
| <b>Perforation</b>                                               | X                  |                      | 998.2                   | Accidental puncture or laceration during a procedure, not elsewhere classified                                      |
| <b>Superior vena cava obstruction/venous thromboembolism</b>     | X                  | X                    | 459.2                   | Compression of vein                                                                                                 |
|                                                                  | X                  | X                    | 453.72                  | Chronic venous embolism and thrombosis of deep veins of upper extremity                                             |
|                                                                  | X                  | X                    | 453.74                  | Chronic venous embolism and thrombosis of axillary veins                                                            |
|                                                                  | X                  | X                    | 453.75                  | Chronic embolism subclavian veins                                                                                   |
|                                                                  | X                  | X                    | 453.77                  | Chronic venous embolism and thrombosis of other thoracic veins                                                      |
|                                                                  | X                  |                      | 453.83                  | Acute venous embolism and thrombosis of deep veins of upper                                                         |
|                                                                  | X                  |                      | 453.84                  | Acute venous embolism and thrombosis of axillary veins                                                              |
|                                                                  | X                  |                      | 453.85                  | Acute venous embolism and thrombosis of subclavian veins                                                            |
|                                                                  | X                  |                      | 453.86                  | Acute venous embolism and thrombosis of internal jugular veins                                                      |
|                                                                  | X                  |                      | 453.87                  | Acute venous embolism and thrombosis of other thoracic veins                                                        |
|                                                                  | X                  |                      | 415.1x                  | Pulmonary embolism and infarction                                                                                   |
| <b>Pocket-related complications</b>                              |                    |                      |                         |                                                                                                                     |
| Hemorrhage or hematoma/seroma                                    | X                  |                      | 998.1x                  | Hemorrhage or hematoma complicating a procedure not elsewhere classified                                            |
| Wound disruption                                                 | X                  |                      | 998.3x                  | Disruption of operation wound                                                                                       |
|                                                                  | X                  |                      | 998.83                  | Nonhealing surgical wound                                                                                           |
| Foreign body/reaction to foreign substance left during procedure | X                  |                      | 998.4                   | Foreign body accidentally left during a procedure                                                                   |
|                                                                  | X                  |                      | 998.7                   | Acute reaction to foreign substance accidentally left during a procedure                                            |
| Persistent postoperative fistula                                 | X                  |                      | 998.6                   | Persistent postoperative fistula                                                                                    |

Supplemental Table 2: Claims codes used for defining ICD reoperations for reasons other than complications

| Claims Code, by Type of Reoperation | Code Type | Code Description                                                                                                                                                                                                                                                                    |
|-------------------------------------|-----------|-------------------------------------------------------------------------------------------------------------------------------------------------------------------------------------------------------------------------------------------------------------------------------------|
| <b>Pocket reoperation</b>           |           |                                                                                                                                                                                                                                                                                     |
| 33223                               | CPT       | Revision of skin pocket for cardioverter-defibrillator                                                                                                                                                                                                                              |
| 3779                                | ICD-9-CM  | Revision or relocation of cardiac device pocket                                                                                                                                                                                                                                     |
| <b>Generator reoperation</b>        |           |                                                                                                                                                                                                                                                                                     |
| 33230                               | CPT       | Insertion of pacing cardioverter-defibrillator pulse generator only; with existing dual leads                                                                                                                                                                                       |
| 33231                               | CPT       | Insertion of pacing cardioverter-defibrillator pulse generator only; with existing multiple leads                                                                                                                                                                                   |
| 33249                               | CPT       | Insertion or replacement of permanent pacing cardioverter-defibrillator system with transvenous lead(s), single or dual chamber                                                                                                                                                     |
| 33240                               | CPT       | Insertion of pacing cardioverter-defibrillator pulse generator only; with existing single lead                                                                                                                                                                                      |
| 33262                               | CPT       | Removal of pacing cardioverter-defibrillator pulse generator with replacement of pacing cardioverter-defibrillator pulse generator; single lead system                                                                                                                              |
| 33263                               | CPT       | Removal of pacing cardioverter-defibrillator pulse generator with replacement of pacing cardioverter-defibrillator pulse generator; dual lead system                                                                                                                                |
| 33264                               | CPT       | Removal of pacing cardioverter-defibrillator pulse generator with replacement of pacing cardioverter-defibrillator pulse generator; multiple lead system                                                                                                                            |
| 33241                               | CPT       | Removal of pacing cardioverter-defibrillator pulse generator only                                                                                                                                                                                                                   |
| 3798                                | ICD-9-CM  | Replacement of automatic cardioverter defibrillator pulse generator only                                                                                                                                                                                                            |
| 3794                                | ICD-9-CM  | Implantation or replacement of automatic cardioverter defibrillator, total system [aicd]                                                                                                                                                                                            |
| 3796                                | ICD-9-CM  | Implantation of automatic cardioverter/defibrillator pulse generator only                                                                                                                                                                                                           |
| 0051                                | ICD-9-CM  | Implantation of cardiac resynchronization defibrillator, total system [crt-d]                                                                                                                                                                                                       |
| 0054                                | ICD-9-CM  | Implantation or replacement of cardiac resynchronization defibrillator pulse generator only [crt-d]                                                                                                                                                                                 |
| 3789                                | ICD-9-CM  | Revision or removal of pacemaker device                                                                                                                                                                                                                                             |
| <b>Lead reoperation alone</b>       |           |                                                                                                                                                                                                                                                                                     |
| 33216                               | CPT       | Insertion of a single transvenous electrode, permanent pacemaker or cardioverter-defibrillator                                                                                                                                                                                      |
| 33217                               | CPT       | Insertion of 2 transvenous electrodes, permanent pacemaker or cardioverter-defibrillator                                                                                                                                                                                            |
| 33224                               | CPT       | Insertion of pacing electrode, cardiac venous system, for left ventricular pacing, with attachment to previously placed pacemaker or pacing cardioverter-defibrillator pulse generator (including revision of pocket, removal, insertion, and/or replacement of existing generator) |
| 33225                               | CPT       | Insertion of pacing electrode, cardiac venous system, for left ventricular pacing, at time of insertion of pacing cardioverter-defibrillator or pacemaker pulse generator (e.g., for upgrade to dual chamber system) (list separately in addition to code for primary procedure)    |
| 33202                               | CPT       | Insertion of epicardial electrode(s); open incision (e.g., thoracotomy, median sternotomy, subxiphoid approach)                                                                                                                                                                     |
| 33203                               | CPT       | Insertion of epicardial electrode(s); endoscopic approach (e.g., thoracoscopy, pericardioscopy)                                                                                                                                                                                     |
| 33215                               | CPT       | Repositioning of previously implanted transvenous pacemaker or pacing cardioverter-defibrillator (right atrial or right ventricular) electrode                                                                                                                                      |
| 33218                               | CPT       | Repair of single transvenous electrode, permanent pacemaker or pacing cardioverter-defibrillator                                                                                                                                                                                    |
| 33220                               | CPT       | Repair of 2 transvenous electrodes for permanent pacemaker or pacing cardioverter-defibrillator                                                                                                                                                                                     |
| 33226                               | CPT       | Repositioning of previously implanted cardiac venous system (left ventricular) electrode (including removal, insertion and/or replacement of existing generator)                                                                                                                    |
| 33243                               | CPT       | Removal of single or dual chamber pacing cardioverter-defibrillator electrode(s); by thoracotomy                                                                                                                                                                                    |
| 33244                               | CPT       | Removal of single or dual chamber pacing cardioverter-defibrillator electrode(s); by transvenous extraction                                                                                                                                                                         |
| 33234                               | CPT       | Removal of transvenous pacemaker electrode(s); single lead system, atrial or ventricular                                                                                                                                                                                            |
| 33235                               | CPT       | Removal of transvenous pacemaker electrode(s); dual lead system                                                                                                                                                                                                                     |
| 33238                               | CPT       | Removal of permanent transvenous electrode(s) by thoracotomy                                                                                                                                                                                                                        |
| 0052                                | ICD-9-CM  | Implantation or replacement of transvenous lead [electrode] into left ventricular coronary venous system                                                                                                                                                                            |
| 3770                                | ICD-9-CM  | Initial insertion of lead [electrode], not otherwise specified                                                                                                                                                                                                                      |
| 3771                                | ICD-9-CM  | Initial insertion of transvenous lead [electrode] into ventricle                                                                                                                                                                                                                    |
| 3772                                | ICD-9-CM  | Initial insertion of transvenous leads [electrodes] into atrium and ventricle                                                                                                                                                                                                       |
| 3773                                | ICD-9-CM  | Initial insertion of transvenous lead [electrode] into atrium                                                                                                                                                                                                                       |
| 3774                                | ICD-9-CM  | Insertion or replacement of epicardial lead [electrode] into epicardium                                                                                                                                                                                                             |
| 3797                                | ICD-9-CM  | Replacement of automatic cardioverter/defibrillator lead(s) only                                                                                                                                                                                                                    |
| 3795                                | ICD-9-CM  | Implantation of automatic cardioverter/defibrillator lead(s) only                                                                                                                                                                                                                   |
| 3775                                | ICD-9-CM  | Revision of lead [electrode]                                                                                                                                                                                                                                                        |
| 3777                                | ICD-9-CM  | Removal of lead(s) [electrode] without replacement                                                                                                                                                                                                                                  |

CPT = Current Procedural Terminology; ICD = implantable cardioverter-defibrillator; ICD-9-CM = International Classification of Diseases, Ninth Revision, Clinical Modification. Adapted from Ranasinghe et al., 2016.

Supplemental Table 3:

| Description                         | Total  |       | Physician Specialty |       |                             |       |                      |       |                  |       |                  |       | p-value |
|-------------------------------------|--------|-------|---------------------|-------|-----------------------------|-------|----------------------|-------|------------------|-------|------------------|-------|---------|
|                                     |        |       | Electrophysiologist |       | Interventional Cardiologist |       | General Cardiologist |       | Thoracic Surgeon |       | Other Specialist |       |         |
|                                     | #      | %     | #                   | %     | #                           | %     | #                    | %     | #                | %     | #                | %     |         |
| ALL                                 | 107966 | 100.0 | 74505               | 100.0 | 6219                        | 100.0 | 20795                | 100.0 | 1790             | 100.0 | 4657             | 100.0 |         |
| <b>Demographics</b>                 |        |       |                     |       |                             |       |                      |       |                  |       |                  |       |         |
| Hispanic Ethnicity                  | 4040   | 3.7   | 2593                | 3.5   | 296                         | 4.8   | 750                  | 3.6   | 155              | 8.7   | 246              | 5.3   | <.001   |
| <b>Insurance Payor</b>              |        |       |                     |       |                             |       |                      |       |                  |       |                  |       |         |
| Government: Medicare                | 106344 | 98.5  | 73312               | 98.4  | 6146                        | 98.8  | 20514                | 98.6  | 1776             | 99.2  | 4596             | 98.7  | 0.012   |
| Government: Medicaid                | 325    | 0.3   | 233                 | 0.3   | 18                          | 0.3   | 60                   | 0.3   | 5                | 0.3   | 9                | 0.2   |         |
| Government: Other                   | 120    | 0.1   | 85                  | 0.1   | 4                           | 0.1   | 26                   | 0.1   | 1                | 0.1   | 4                | 0.1   |         |
| Commercial                          | 828    | 0.8   | 613                 | 0.8   | 45                          | 0.7   | 129                  | 0.6   | 4                | 0.2   | 37               | 0.8   |         |
| HMO                                 | 166    | 0.2   | 123                 | 0.2   | 4                           | 0.1   | 33                   | 0.2   | 3                | 0.2   | 3                | 0.1   |         |
| Other                               | 183    | 0.2   | 139                 | 0.2   | 2                           | 0.0   | 33                   | 0.2   | 1                | 0.1   | 8                | 0.2   |         |
| <b>Hospital Reason</b>              |        |       |                     |       |                             |       |                      |       |                  |       |                  |       |         |
| Admitted for this Procedure         | 64545  | 59.8  | 44084               | 59.2  | 4004                        | 64.4  | 12859                | 61.8  | 933              | 52.1  | 2665             | 57.2  | <.001   |
| Hospitalized-Cardiac                | 14607  | 13.5  | 10142               | 13.6  | 748                         | 12.0  | 2728                 | 13.1  | 318              | 17.8  | 671              | 14.4  |         |
| Hospitalized-Non-Cardiac            | 24893  | 23.1  | 17518               | 23.5  | 1287                        | 20.7  | 4506                 | 21.7  | 441              | 24.6  | 1141             | 24.5  |         |
| Missing or Unknown                  | 3921   | 3.6   | 2761                | 3.7   | 180                         | 2.9   | 702                  | 3.4   | 98               | 5.5   | 180              | 3.9   |         |
| <b>History and Risk Factors</b>     |        |       |                     |       |                             |       |                      |       |                  |       |                  |       |         |
| Sinus Node Function: Abnormal       | 35351  | 32.7  | 24492               | 32.9  | 1977                        | 31.8  | 6615                 | 31.8  | 666              | 37.2  | 1601             | 34.4  | <.001   |
| Non-Ischemic Dilated Cardiomyopathy | 28977  | 26.8  | 20269               | 27.2  | 1459                        | 23.5  | 5541                 | 26.6  | 459              | 25.6  | 1249             | 26.8  | <.001   |
| Previous Valvular Surgery           | 9309   | 8.62  | 6560                | 8.80  | 419                         | 6.74  | 1787                 | 8.59  | 170              | 9.50  | 373              | 8.01  | <.001   |
| <b>Diagnostics</b>                  |        |       |                     |       |                             |       |                      |       |                  |       |                  |       |         |

|                                                                  |        |      |        |      |        |      |        |      |        |      |        |      |       |
|------------------------------------------------------------------|--------|------|--------|------|--------|------|--------|------|--------|------|--------|------|-------|
| %EF: Categories                                                  |        |      |        |      |        |      |        |      |        |      |        |      |       |
| Missing                                                          | 1367   | 1.3  | 875    | 1.2  | 107    | 1.7  | 285    | 1.4  | 26     | 1.5  | 74     | 1.6  |       |
| <=15                                                             | 10793  | 10.0 | 7412   | 9.9  | 619    | 10.0 | 2071   | 10.0 | 234    | 13.1 | 457    | 9.8  |       |
| >15 to 20                                                        | 19897  | 18.4 | 13708  | 18.4 | 1165   | 18.7 | 3751   | 18.0 | 383    | 21.4 | 890    | 19.1 | <.001 |
| >20 to 25                                                        | 22856  | 21.2 | 15825  | 21.2 | 1275   | 20.5 | 4439   | 21.3 | 388    | 21.7 | 929    | 19.9 |       |
| >25                                                              | 53053  | 49.1 | 36685  | 49.2 | 3053   | 49.1 | 10249  | 49.3 | 759    | 42.4 | 2307   | 49.5 |       |
| Electrophysiology Study Done                                     | 15957  | 14.8 | 12400  | 16.6 | 299    | 4.8  | 2460   | 11.8 | 146    | 8.2  | 652    | 14.0 | <.001 |
| PR Interval Attainable                                           | 75828  | 70.2 | 52268  | 70.2 | 4420   | 71.1 | 14621  | 70.3 | 1207   | 67.4 | 3312   | 71.1 | 0.028 |
| PR Interval When PR Interval Attainable                          | 185.60 | 39.3 | 185.82 | 39.3 | 184.78 | 39.0 | 185.36 | 39.2 | 185.02 | 39.6 | 184.48 | 39.1 | 0.042 |
| Atrioventricular Conduction                                      |        |      |        |      |        |      |        |      |        |      |        |      |       |
| Normal                                                           | 70041  | 64.9 | 48376  | 64.9 | 4124   | 66.3 | 13478  | 64.8 | 1103   | 61.6 | 2960   | 63.6 |       |
| Abnormal-1st Degree Heart Block Only                             | 20890  | 19.3 | 14540  | 19.5 | 1149   | 18.5 | 3936   | 18.9 | 312    | 17.4 | 953    | 20.5 | <.001 |
| Abnormal-Heart Block 2nd or 3rd Degree                           | 5070   | 4.7  | 3475   | 4.7  | 264    | 4.2  | 981    | 4.7  | 114    | 6.4  | 236    | 5.1  |       |
| Paced (any)                                                      | 11965  | 11.1 | 8114   | 10.9 | 682    | 11.0 | 2400   | 11.5 | 261    | 14.6 | 508    | 10.9 |       |
| Intraventricular Conduction                                      |        |      |        |      |        |      |        |      |        |      |        |      |       |
| Normal                                                           | 39150  | 36.3 | 26802  | 36.0 | 2438   | 39.2 | 7586   | 36.5 | 669    | 37.4 | 1655   | 35.5 |       |
| Abnormal-LBBB                                                    | 32339  | 30.0 | 22851  | 30.7 | 1682   | 27.0 | 5968   | 28.7 | 446    | 24.9 | 1392   | 29.9 |       |
| Abnormal-RBBB, Bifascicular Block (RBBB Plus LAF, RBBB Plus LPF) | 11495  | 10.6 | 7979   | 10.7 | 640    | 10.3 | 2137   | 10.3 | 206    | 11.5 | 533    | 11.4 | <.001 |
| Paced                                                            | 10916  | 10.1 | 7364   | 9.9  | 630    | 10.1 | 2241   | 10.8 | 242    | 13.5 | 439    | 9.4  |       |
| Other                                                            | 14066  | 13.0 | 9509   | 12.8 | 829    | 13.3 | 2863   | 13.8 | 227    | 12.7 | 638    | 13.7 |       |
| BUN Level: Mean (SD)                                             | 26.23  | 14.3 | 26.33  | 14.3 | 25.83  | 14.1 | 25.87  | 13.9 | 27.34  | 15.8 | 26.28  | 14.7 | <.001 |
| Systolic BP: Mean (SD)                                           | 132.88 | 22.6 | 132.49 | 22.5 | 133.38 | 22.7 | 133.92 | 22.8 | 132.53 | 22.5 | 133.85 | 23.0 | <.001 |

Abbreviations: HMO, health maintenance organization; EF, ejection fraction; LBBB, left bundle branch block; RBBB, right bundle branch block; LAF, left anterior fascicular; LPF, left posterior fascicular; SD, standard deviation; BUN, blood urea nitrogen; BNP, blood natriuretic peptide; BP, blood pressure
